# Supplementary material
Source: PubMed Central journal article supplement (PMC4219584)

**Supplemental Data:**

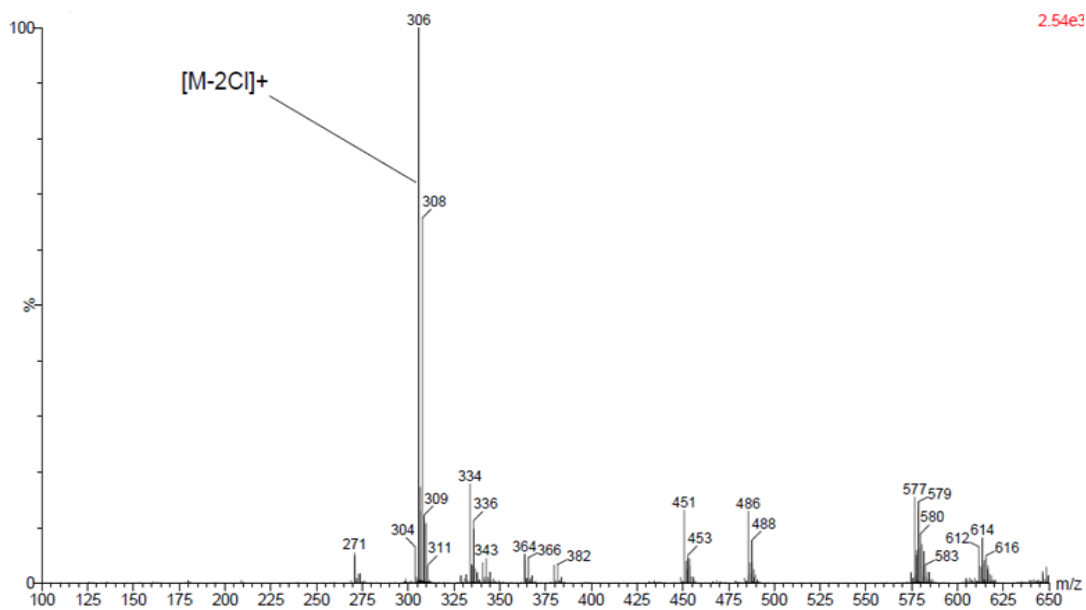

**Supplemental Figure 1:** LIFDI mass spectrometry analysis of compound **1**. The  $[(\text{phen})\text{FeCl}_2]^+$  molecular ion is observed at  $m/z = 306$  (identified on the spectrum as  $[\text{M}-2\text{Cl}]^+$ ).

Eichler (UCR) JFE-III-2011-18B LIFDI  
3051203g 119 (1.984) Cm (88:136)

TOF MS FD+  
1.01e4

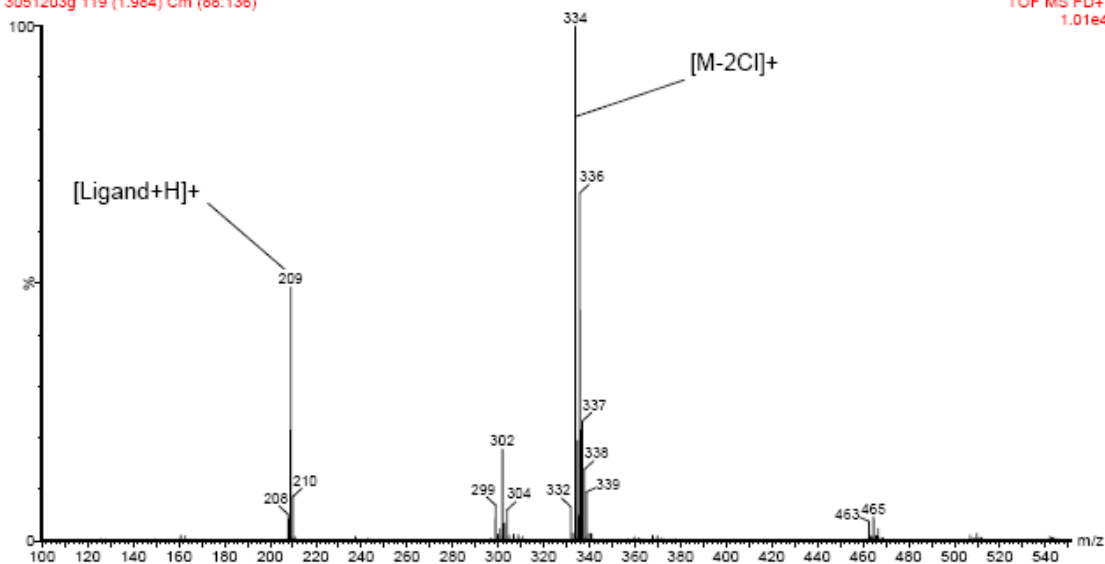

**Supplemental Figure 2:** LIFDI mass spectrometry analysis of compound **2**. The  $[(^{\text{methyl}}\text{phen})\text{FeCl}_2]^+$  molecular ion is observed at  $m/z = 334$  (identified on the spectrum as  $[\text{M}-2\text{Cl}]^+$ ).

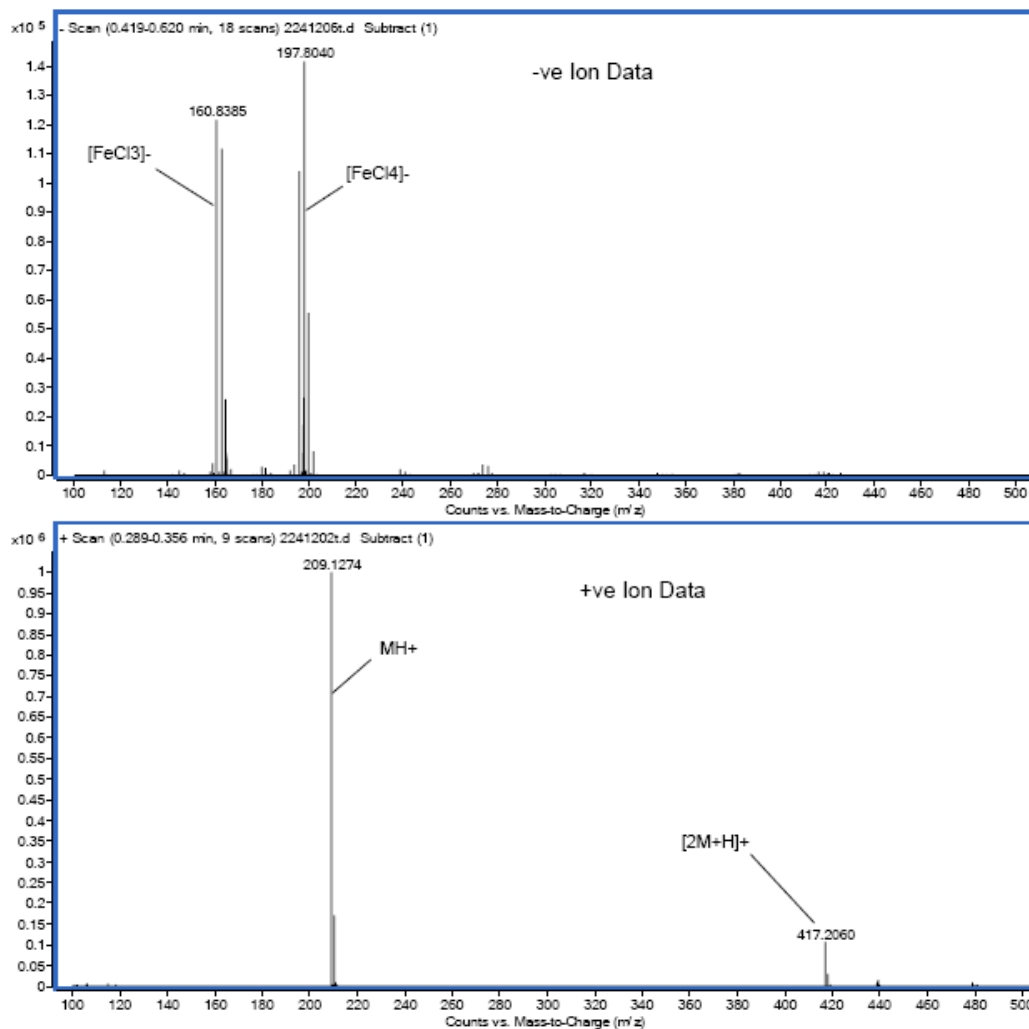

**Supplemental Figure 3:** Representative ESI mass spectrometry data. The ESI mass spectrum of compound **2** is shown. The (<sup>methyl</sup>phenH)<sup>+</sup> molecular ion is observed at  $m/z = 209$  (identified on the spectrum as  $MH^+$ ) in positive ion mode, and the  $(FeCl_4)^-$  molecular ion is observed at  $m/z = 198$  in the negative ion mode.

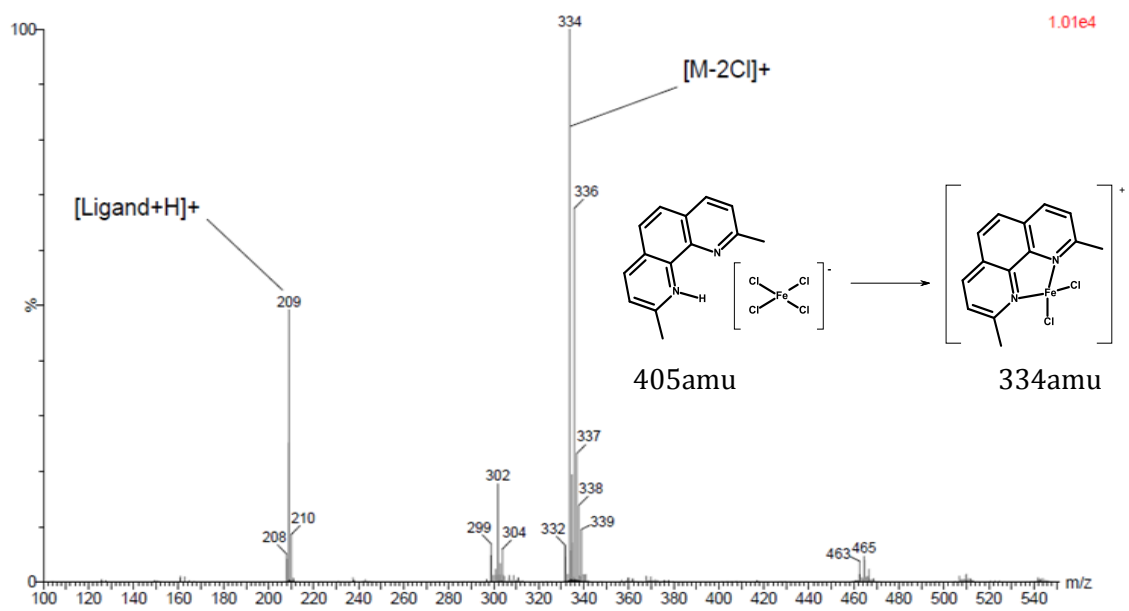

Supplement: NIHMS577697-supplement-1.pdf [file NIHMS577697-supplement-1.pdf]
